# Supplementary material for: Synthesis of Graphene Oxide from Sugarcane Dry Leaves by Two-Stage Pyrolysis
Source: MDPI journal article supplement (doi:10.3390/molecules28083329), 2023-04-10
Supplement: s1 [file s1]

### Supplementary information

**Table S1.** Comparative analysis of GO Synthesis methods and properties reported in the literature.

| Synthesis method                                 | Carbon precursor     | Reaction time | Reaction temperature (°C)             | Oxidizing / Reducing agents                                                                                 | Functional groups                           | $I_D/I_G$ ratio       | Interlayer spacing 'd' (nm) | Reference  |
|--------------------------------------------------|----------------------|---------------|---------------------------------------|-------------------------------------------------------------------------------------------------------------|---------------------------------------------|-----------------------|-----------------------------|------------|
| Improved Hummers'                                | Graphite flake       | 12 h          | > 50                                  | H <sub>2</sub> SO <sub>4</sub> / H <sub>3</sub> PO <sub>4</sub> , KMnO <sub>4</sub>                         | O-H, C=O, C=C, C-O                          | NA                    | 0.95                        | [11]       |
| Modified Hummers'                                | Graphite flake       | 13 h          | > 35                                  | NaNO <sub>3</sub> , H <sub>2</sub> SO <sub>4</sub> , KMnO <sub>4</sub> , K <sub>3</sub> Fe(CN) <sub>6</sub> | O-H, CH <sub>2</sub> , C=C, C=O, C-O, C-OH  | NA                    | 0.77                        | [80]       |
| Hummers' and improved Hummers' with purification | Graphite powder      | 7.5 days      | 40                                    | NaNO <sub>3</sub> , H <sub>2</sub> SO <sub>4</sub> , KMnO <sub>4</sub>                                      | C-O-C, C-O, C=C, C=O, O-H                   | NA                    | 0.81                        | [12]       |
| Improved Hummers' with purification              | Graphite powder      | 7.5 days      | 40                                    | H <sub>2</sub> SO <sub>4</sub> , KMnO <sub>4</sub> , H <sub>2</sub> O <sub>2</sub>                          | C-O-C, C-O, C=C, C=O, O-H                   | 0.61                  | 0.831                       | [81]       |
| Modified Hummers'                                | Graphite flake       | 5 h           | > 35                                  | H <sub>2</sub> SO <sub>4</sub> , KMnO <sub>4</sub> , K <sub>2</sub> FeO <sub>4</sub>                        | -OH, CH <sub>2</sub> , C=C, C=O, C-O, C-O-C | GO1 -1.07<br>GO2-0.94 | GO1-0.83<br>GO2-0.81        | [82]       |
| Pyrolysis and Hummers' method                    | Rice straw           | 4.5 h         | 450 (Pyrolysis), 45 (Hummer's method) | H <sub>2</sub> SO <sub>4</sub> , KMnO <sub>4</sub>                                                          | C=C, C=O, O-H, C=C, C-N, C-H, C-N           | NA                    | NA                          | [7]        |
| Two-stage pyrolysis                              | Sugarcane dry leaves | 9 h           | 800                                   | H <sub>2</sub> SO <sub>4</sub>                                                                              | -OH, CH <sub>2</sub> , C-O, C=C, C=H, C=O   | 0.92                  | 0.71                        | This study |

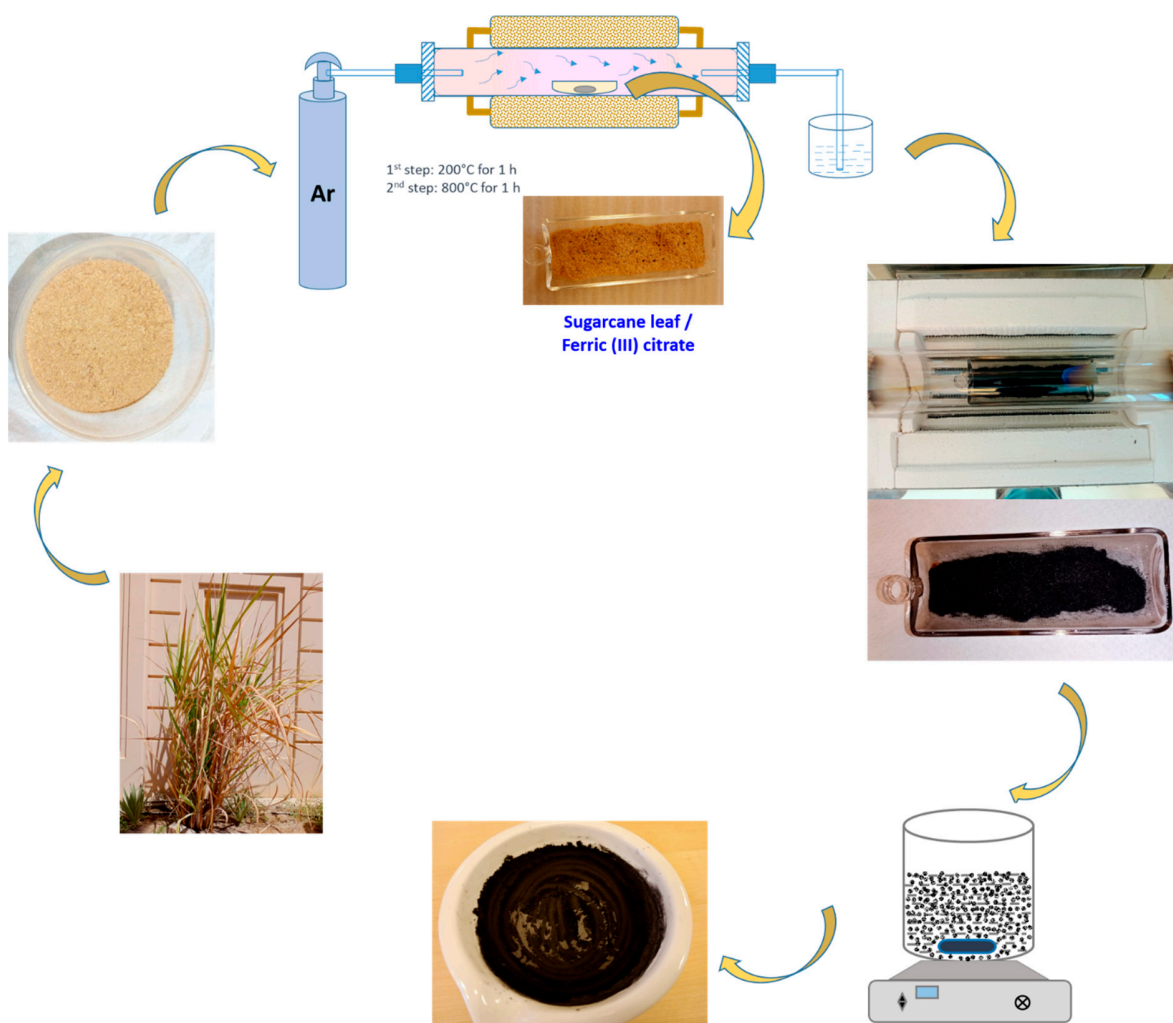

**Scheme S1.** The processing steps for the preparation of GO from sugarcane dry leaves.
